# Supplementary material
Source: PubMed Central journal article supplement (PMC10242510)
Supplement: jama-e239526-s001.pdf [file jama-e239526-s001.pdf]

## Supplemental Online Content

Kurian AW, Abrahamse P, Furgal A, et al. Germline genetic testing after cancer diagnosis. *JAMA*. Published June 5, 2023. doi:10.1001/jama.2023.9526

**eFigure 1.** Flow and decay diagram

**eFigure 2.** Genes with pathogenic results, grouped by associated cancers and/or hereditary syndromes and by practice guideline indications for clinical testing, with MUTYH re-categorized as a gene with no practice guidelines for testing

### **eMethods**

**eTable 1.** All tested genes, grouped by cancer type associations and testing guideline recommendations

**eTable 2.** Genetic testing utilization among individuals with all other cancer types, diagnosed 2013-2019

**eTable 3.** Genetic testing time trends among individuals diagnosed with cancer in Georgia and California and reported to SEER registries from 2013-2019

**eTable 4.** Logistic regression model output for individuals diagnosed with cancer in Georgia and California and reported to SEER registries from 2013-2019, controlling for age and cancer type and allowing for a year by cancer type interaction

**eTable 5.** Three logistic regression model outputs regressing genetic testing on SEER racial and ethnic categories controlling for year, age and a variable that indicates the three cancers with the highest testing rates that had testing guidelines throughout the study period (male breast, female breast, and ovarian cancer) for cancers diagnosed in Georgia and California and reported to SEER registries from 2013-2019

**eTable 6.** Uncertain and pathogenic results and ratio in individuals with selected cancers diagnosed and reported to Georgia and California SEER registries, 2013-2019

**eTable 7.** Uncertain and pathogenic results and ratio in individuals with cancers diagnosed and reported to Georgia and California SEER Registries, 2013-2019, by race and ethnicity

This supplemental material has been provided by the authors to give readers additional information about their work.

**eFigure 1.** Flow and decay diagram

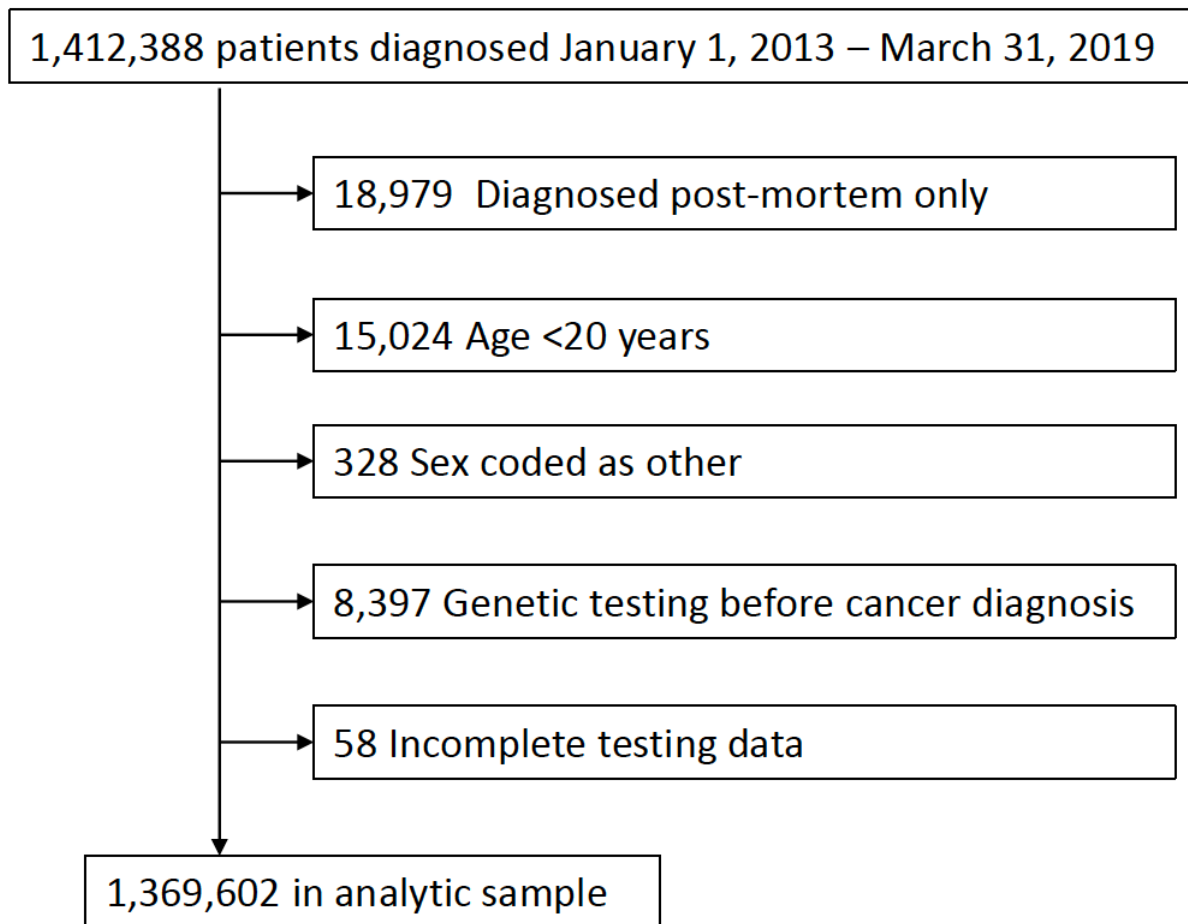

**eFigure 2.** Genes with pathogenic results, grouped by associated cancers and/or hereditary syndromes and by practice guideline indications for clinical testing, with *MUTYH* re-categorized as a gene with no practice guidelines for testing.

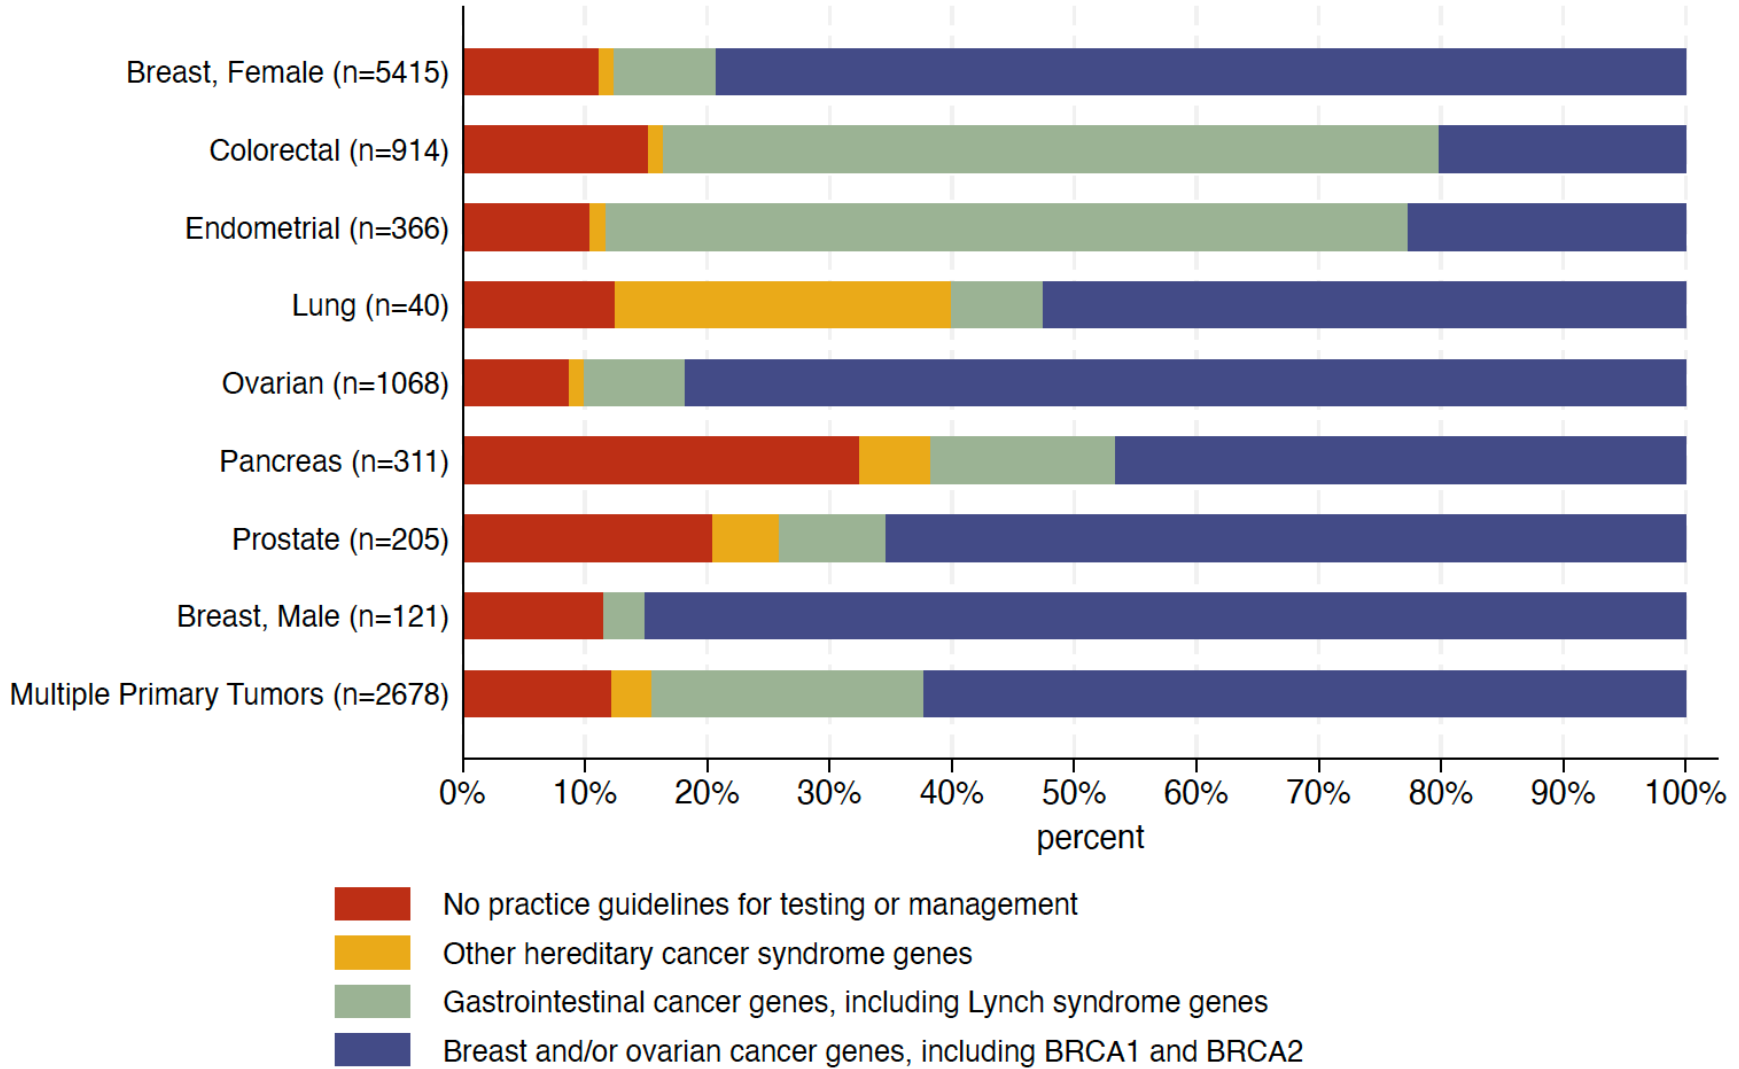

## eMethods

### Genetic Testing Results

To protect confidentiality of the four participating laboratories, only those genes that were offered for testing by two or more laboratories (N=107, shown in **eTable 1**) were included for analysis. If a patient received more than one test of a given gene over time, or if the laboratory re-classified results of a tested gene over time (e.g., uncertain to benign), the most recent interpretation provided by the laboratory to the ordering clinician was used for analysis.

### Logistic Regression Model Specification and Model Output

#### *Model for Testing Time Trends Across Years of Cancer Diagnosis, 2013-2019*

The model for testing from 2013-2019 includes age (in decades, centered at the mean age of the sample, 62 years) and calendar year of cancer diagnosis (2013-2019, centered at 2016). The model also includes fixed effects for 10 cancer types (the 8 most common along with a group representing multiple cancers and a final group for all other cancers), thus estimating the variation in testing rates across cancers. An interaction term of year with cancer type was also included to allow the trends across year to vary across the cancer types. The coefficients for these variables were large with relatively small standard errors. The outputs of this model are shown as predicted probabilities of testing by the year and cancer type variables averaging across age in **Figure 1**, and the odds ratios for each variable in the full model are presented in **eTable 4**.

#### *Model for Differences in Genetic Testing by Racial and Ethnic Groups*

For this model, we built on the trend model described above by adding a variable with five racial and ethnic groups (Asian, Black, Hispanic, non-Hispanic White, Other). In addition, we added a variable (breast-ovary) that indicates the three cancers with the highest testing rates that had testing guidelines throughout the study period (male breast, female breast, and ovarian cancer), as these cancers might be expected to have fewer racial and ethnic disparities, given the presence of well-established guidelines for testing.

Thus, the second model added an interaction between the breast-ovary variable and racial and ethnic group to test whether the race and ethnicity effects were different among male breast, female breast, and ovarian

cancer versus all other cancers. The improvement in fit was assessed by the magnitude of the interaction coefficients along with the 95% confidence intervals, as well as by a likelihood ratio test comparing the two models. As all of these suggested improved model fit, the interaction term was retained.

In a third model, we added an interaction term between the racial and ethnic groups and year of cancer diagnosis, to assess for changes in the odds of testing between racial and ethnic groups across years of cancer diagnosis as a sign that any disparities are increasing or decreasing. Again, improvement in fit was assessed by the magnitude of the interaction coefficients and the likelihood ratio test comparing the second and third models. In this case, model fit also improved by a smaller amount judging by the relatively small coefficients for the interaction terms; however, with the large sample size, overall model fit still improved using the likelihood ratio test, with a conventional  $p < 0.05$  value cutoff, so the interaction was retained in the final model. The outputs of this model are shown as predicted probabilities **Figure 2** and tables of odds ratios for all three models, along with the likelihood ratio tests, are in **eTable 5**.

Results of the models are presented as marginal effects or as differences in the probability of the outcome as a predictor changes, holding all the other covariates constant by averaging across the covariate values of all the persons in the sample<sup>1</sup>.

## eReference

1. Norton EC, Dowd BE, Maciejewski ML. Marginal Effects-Quantifying the Effect of Changes in Risk Factors in Logistic Regression Models. *JAMA*. Apr 2 2019;321(13):1304-1305. doi:10.1001/jama.2019.1954

|                                                                                                              |
|--------------------------------------------------------------------------------------------------------------|
| <b>eTable 1.</b> All tested genes, grouped by cancer type associations and testing guideline recommendations |
| <b>Breast and/or Ovarian Cancer-Associated Genes<sup>a</sup></b>                                             |
| <i>BRCA1</i>                                                                                                 |
| <i>BRCA2</i>                                                                                                 |
| <i>ATM</i>                                                                                                   |
| <i>BARD1</i>                                                                                                 |
| <i>BRIP1</i>                                                                                                 |
| <i>CDH1</i>                                                                                                  |
| <i>CHEK2</i>                                                                                                 |
| <i>DICER1</i>                                                                                                |
| <i>NF1</i>                                                                                                   |
| <i>PALB2</i>                                                                                                 |
| <i>PTEN</i>                                                                                                  |
| <i>RAD51C</i>                                                                                                |
| <i>RAD51D</i>                                                                                                |
| <i>SMARCA4</i>                                                                                               |
| <i>STK11</i>                                                                                                 |
| <i>TP53</i>                                                                                                  |
| <b>Gastrointestinal Cancer-Associated Genes<sup>a</sup></b>                                                  |
| <u>Lynch Syndrome genes</u>                                                                                  |
| <i>EPCAM</i>                                                                                                 |
| <i>MLH1</i>                                                                                                  |
| <i>MSH2</i>                                                                                                  |
| <i>MSH6</i>                                                                                                  |
| <i>PMS2</i>                                                                                                  |
| <u>Other gastrointestinal cancer-associated genes</u>                                                        |
| <i>APC</i>                                                                                                   |
| <i>AXIN2</i>                                                                                                 |
| <i>BMPR1A</i>                                                                                                |
| <i>CDKN2A</i>                                                                                                |
| <i>GREM1</i>                                                                                                 |
| <i>MLH3</i>                                                                                                  |
| <i>MSH3</i>                                                                                                  |
| <i>MUTYH<sup>b</sup></i>                                                                                     |
| <i>NTHL1</i>                                                                                                 |
| <i>POLD1</i>                                                                                                 |
| <i>POLE</i>                                                                                                  |
| <i>SMAD4</i>                                                                                                 |
| <b>Other Hereditary Cancer Syndrome-Associated Genes<sup>a</sup></b>                                         |
| <i>BAP1</i>                                                                                                  |
| <i>CDK4</i>                                                                                                  |
| <i>CEBPA</i>                                                                                                 |
| <i>EGFR</i>                                                                                                  |
| <i>FH</i>                                                                                                    |
| <i>FLCN</i>                                                                                                  |
| <i>KIT</i>                                                                                                   |
| <i>LZTR1</i>                                                                                                 |
| <i>MAX</i>                                                                                                   |
| <i>MEN1</i>                                                                                                  |
| <i>MET</i>                                                                                                   |

| <b>eTable 1. All tested genes, grouped by cancer type associations and testing guideline recommendations</b> |
|--------------------------------------------------------------------------------------------------------------|
| <i>MITF</i>                                                                                                  |
| <i>NF2</i>                                                                                                   |
| <i>POT1</i>                                                                                                  |
| <i>PTCH1</i>                                                                                                 |
| <i>RB1</i>                                                                                                   |
| <i>RET</i>                                                                                                   |
| <i>SDHA</i>                                                                                                  |
| <i>SDHAF2</i>                                                                                                |
| <i>SDHB</i>                                                                                                  |
| <i>SDHC</i>                                                                                                  |
| <i>SDHD</i>                                                                                                  |
| <i>SMARCB1</i>                                                                                               |
| <i>SUFU</i>                                                                                                  |
| <i>TMEM127</i>                                                                                               |
| <i>TSC1</i>                                                                                                  |
| <i>TSC2</i>                                                                                                  |
| <i>VHL</i>                                                                                                   |
| <i>WT1</i>                                                                                                   |
| <b>Genes with No Guidelines for Clinical Testing after a Cancer Diagnosis</b>                                |
| <i>AIP</i>                                                                                                   |
| <i>AKT1</i>                                                                                                  |
| <i>ALK</i>                                                                                                   |
| <i>BLM</i>                                                                                                   |
| <i>BUB1B</i>                                                                                                 |
| <i>CASR</i>                                                                                                  |
| <i>CDC73</i>                                                                                                 |
| <i>CDKN1B</i>                                                                                                |
| <i>CDKN1C</i>                                                                                                |
| <i>CFTR</i>                                                                                                  |
| <i>CPA1</i>                                                                                                  |
| <i>CTC1</i>                                                                                                  |
| <i>CTNNA1</i>                                                                                                |
| <i>CTR9</i>                                                                                                  |
| <i>CTRC</i>                                                                                                  |
| <i>DIS3L2</i>                                                                                                |
| <i>DKC1</i>                                                                                                  |
| <i>EGLN1</i>                                                                                                 |
| <i>FAM175A</i>                                                                                               |
| <i>FANCC</i>                                                                                                 |
| <i>FANCM</i>                                                                                                 |
| <i>GALNT12</i>                                                                                               |
| <i>GATA2</i>                                                                                                 |
| <i>HOXB13</i>                                                                                                |
| <i>KIF1B</i>                                                                                                 |
| <i>MRE11A</i>                                                                                                |
| <i>NBN</i>                                                                                                   |
| <i>PALLD</i>                                                                                                 |
| <i>PDGFRA</i>                                                                                                |
| <i>PHOX2B</i>                                                                                                |

| <b>eTable 1.</b> All tested genes, grouped by cancer type associations and testing guideline recommendations                                                                                                                                                                                                                                                                                                                                                                                                                     |
|----------------------------------------------------------------------------------------------------------------------------------------------------------------------------------------------------------------------------------------------------------------------------------------------------------------------------------------------------------------------------------------------------------------------------------------------------------------------------------------------------------------------------------|
| <i>PRKAR1A</i>                                                                                                                                                                                                                                                                                                                                                                                                                                                                                                                   |
| <i>PRSS1</i>                                                                                                                                                                                                                                                                                                                                                                                                                                                                                                                     |
| <i>RAD50</i>                                                                                                                                                                                                                                                                                                                                                                                                                                                                                                                     |
| <i>RECQL</i>                                                                                                                                                                                                                                                                                                                                                                                                                                                                                                                     |
| <i>RINT1</i>                                                                                                                                                                                                                                                                                                                                                                                                                                                                                                                     |
| <i>RNF43</i>                                                                                                                                                                                                                                                                                                                                                                                                                                                                                                                     |
| <i>RPS20</i>                                                                                                                                                                                                                                                                                                                                                                                                                                                                                                                     |
| <i>RTEL1</i>                                                                                                                                                                                                                                                                                                                                                                                                                                                                                                                     |
| <i>RUNX1</i>                                                                                                                                                                                                                                                                                                                                                                                                                                                                                                                     |
| <i>SMARCE1</i>                                                                                                                                                                                                                                                                                                                                                                                                                                                                                                                   |
| <i>SPINK1</i>                                                                                                                                                                                                                                                                                                                                                                                                                                                                                                                    |
| <i>SPRED1</i>                                                                                                                                                                                                                                                                                                                                                                                                                                                                                                                    |
| <i>TERC</i>                                                                                                                                                                                                                                                                                                                                                                                                                                                                                                                      |
| <i>TERT</i>                                                                                                                                                                                                                                                                                                                                                                                                                                                                                                                      |
| <i>XRCC2</i>                                                                                                                                                                                                                                                                                                                                                                                                                                                                                                                     |
| <p><sup>a</sup>Practice guidelines of the National Comprehensive Cancer Network and/or American College of Medical Genetics advise testing of these genes for cancer risk assessment and/or cancer treatment, in appropriate clinical circumstances.</p> <p><sup>b</sup>Given uncertainty as to whether monoallelic <i>MUTYH</i> pathogenic results are clinically actionable, <i>MUTYH</i> was re-coded as a gene with no testing guidelines in a sensitivity analysis, the results of which are shown in <b>eFigure 2</b>.</p> |



| <b>eTable 2.</b> Genetic testing utilization among individuals with all other cancer types <sup>a</sup> , diagnosed 2013-2019 |        |           |
|-------------------------------------------------------------------------------------------------------------------------------|--------|-----------|
| Anatomic site as coded by SEER                                                                                                | N      | Tested, % |
| Lip                                                                                                                           | 1,699  | 0.2       |
| Tongue                                                                                                                        | 8,660  | 0.4       |
| Salivary gland                                                                                                                | 2,945  | 0.5       |
| Floor of mouth                                                                                                                | 878    | 0.2       |
| Gum and other mouth                                                                                                           | 3,136  | 0.4       |
| Nasopharynx                                                                                                                   | 1,839  | 0.3       |
| Tonsil                                                                                                                        | 5,650  | 0.3       |
| Oropharynx                                                                                                                    | 1,223  | 0.0       |
| Hypopharynx                                                                                                                   | 1,083  | 0.2       |
| Other oral cavity and pharynx                                                                                                 | 427    | 0.0       |
| Esophagus                                                                                                                     | 9,143  | 0.7       |
| Stomach                                                                                                                       | 18,382 | 3.1       |
| Small intestine                                                                                                               | 5,051  | 3.6       |
| Anus, anal canal and anorectum                                                                                                | 7,461  | 0.9       |
| Liver                                                                                                                         | 23,056 | 0.1       |
| Intrahepatic bile duct                                                                                                        | 3,217  | 2.7       |
| Gallbladder                                                                                                                   | 3,262  | 1.1       |
| Other biliary                                                                                                                 | 5,023  | 2.6       |
| Retroperitoneum                                                                                                               | 825    | 3.0       |
| Peritoneum, omentum and mesentery                                                                                             | 168    | 3.0       |
| Other digestive organs                                                                                                        | 1,759  | 1.8       |
| Nose, nasal cavity and middle ear                                                                                             | 1,691  | 0.5       |
| Larynx                                                                                                                        | 5,994  | 0.2       |
| Pleura                                                                                                                        | 1,238  | 0.5       |
| Trachea, mediastinum and other respiratory organs                                                                             | 341    | 0.6       |
| Bones and joints                                                                                                              | 1,695  | 1.1       |
| Soft tissue including heart                                                                                                   | 8,110  | 1.7       |
| Melanoma of the skin                                                                                                          | 93,891 | 0.8       |
| Other non-epithelial skin                                                                                                     | 5,430  | 0.9       |
| Cervix uteri                                                                                                                  | 10,642 | 1.3       |
| Uterus, not otherwise specified                                                                                               | 1,271  | 3.5       |
| Ovary (non-epithelial)                                                                                                        | 1,611  | 6.3       |
| Vagina                                                                                                                        | 1,154  | 1.0       |
| Vulva                                                                                                                         | 6,171  | 1.1       |
| Other female genital organs                                                                                                   | 693    | 11.7      |
| Testis                                                                                                                        | 7,947  | 0.5       |
| Penis                                                                                                                         | 1,514  | 0.2       |
| Other male genital organs                                                                                                     | 351    | 0.6       |
| Urinary bladder                                                                                                               | 36,781 | 0.3       |
| Kidney and renal pelvis                                                                                                       | 37,548 | 1.6       |
| Ureter                                                                                                                        | 1,242  | 0.6       |
| Other urinary organs                                                                                                          | 776    | 0.3       |
| Eye and orbit                                                                                                                 | 2,170  | 1.2       |
| Brain                                                                                                                         | 12,893 | 1.0       |
| Cranial nerves and other nervous system                                                                                       | 754    | 1.7       |
| Thyroid                                                                                                                       | 33,945 | 1.3       |

|                                                                                                                                                                    |        |     |
|--------------------------------------------------------------------------------------------------------------------------------------------------------------------|--------|-----|
| Other endocrine including thymus                                                                                                                                   | 1,593  | 5.6 |
| Hodgkin, nodal                                                                                                                                                     | 5,323  | 0.7 |
| Hodgkin, extranodal                                                                                                                                                | 106    | 0.9 |
| Non-Hodgkin lymphoma, nodal                                                                                                                                        | 28,183 | 0.4 |
| Non-Hodgkin lymphoma, extra-nodal                                                                                                                                  | 22,617 | 0.3 |
| Myeloma                                                                                                                                                            | 16,860 | 0.2 |
| Acute lymphocytic leukemia                                                                                                                                         | 690    | 0.7 |
| Chronic lymphocytic leukemia                                                                                                                                       | 2,643  | 0.3 |
| Other lymphocytic leukemia                                                                                                                                         | 863    | 0.3 |
| Acute myeloid leukemia                                                                                                                                             | 7,404  | 0.2 |
| Chronic myeloid leukemia                                                                                                                                           | 4,170  | 0.4 |
| Other myeloid/monocytic leukemia                                                                                                                                   | 200    | 0.5 |
| Acute monocytic leukemia                                                                                                                                           | 386    | 0.0 |
| Other acute leukemia                                                                                                                                               | 295    | 0.3 |
| Aleukemic, subleukemic and not otherwise specified                                                                                                                 | 971    | 0.2 |
| Mesothelioma                                                                                                                                                       | 271    | 0.0 |
| Kaposi sarcoma                                                                                                                                                     | 423    | 0.0 |
| Miscellaneous                                                                                                                                                      | 34,791 | 0.6 |
| <sup>a</sup> Excludes cancers in Table 1: breast (female), breast (male), colorectal, endometrial, lung, ovarian, pancreatic, prostate and multiple primary tumors |        |     |

**Table 3.** Genetic testing time trends<sup>a</sup> among individuals diagnosed with cancer in Georgia and California and reported to SEER registries from 2013-2019

|                   | Breast, Female |      | Breast, Male |      | Colorectal |      | Endometrial |      | Lung   |      | Ovarian |      | Pancreas |      | Prostate |      | Multiple Primary Tumors |      | All Other Cancers |      |  |
|-------------------|----------------|------|--------------|------|------------|------|-------------|------|--------|------|---------|------|----------|------|----------|------|-------------------------|------|-------------------|------|--|
|                   | N              | T, % | N            | T, % | N          | T, % | N           | T, % | N      | T, % | N       | T, % | N        | T, % | N        | T, % | N                       | T, % | N                 | T, % |  |
| Year of Diagnosis |                |      |              |      |            |      |             |      |        |      |         |      |          |      |          |      |                         |      |                   |      |  |
| 2013              | 31,438         | 21.6 | 188          | 43.1 | 14,223     | 3.2  | 5,429       | 2.9  | 16,457 | 0.1  | 2,584   | 28.2 | 4,515    | 1.2  | 21,520   | 0.1  | 42,203                  | 5.2  | 76,920            | 0.3  |  |
| 2014              | 31,526         | 23.4 | 214          | 52.3 | 14,888     | 4.2  | 5,832       | 4.1  | 16,465 | 0.1  | 2,609   | 35.3 | 4,692    | 2.0  | 19,780   | 0.2  | 38,720                  | 6.2  | 80,893            | 0.5  |  |
| 2015              | 32,808         | 25.2 | 216          | 52.3 | 15,213     | 4.9  | 6,133       | 5.3  | 16,759 | 0.2  | 2,770   | 37.8 | 4,835    | 2.6  | 21,611   | 0.3  | 35,265                  | 7.1  | 83,314            | 0.7  |  |
| 2016              | 32,741         | 25.8 | 222          | 50.0 | 15,367     | 5.7  | 6,286       | 6.6  | 16,719 | 0.3  | 2,636   | 39.9 | 5,013    | 4.3  | 22,716   | 0.7  | 33,162                  | 7.4  | 83,211            | 0.9  |  |
| 2017              | 33,282         | 27.0 | 205          | 51.7 | 15,131     | 7.0  | 6,527       | 7.5  | 16,743 | 0.4  | 2,688   | 41.2 | 5,026    | 6.0  | 24,647   | 1.3  | 32,338                  | 8.4  | 83,911            | 1.2  |  |
| 2018              | 33,351         | 30.6 | 232          | 46.6 | 14,987     | 7.9  | 6,569       | 9.9  | 15,907 | 0.6  | 2,574   | 45.6 | 5,213    | 13.0 | 24,262   | 2.7  | 39,845                  | 9.8  | 82,048            | 1.5  |  |
| 2019 <sup>b</sup> | 8,429          | 33.7 | 67           | 61.2 | 3,753      | 9.1  | 1,548       | 10.4 | 4,089  | 0.8  | 583     | 54.2 | 1,301    | 18.6 | 6,274    | 3.7  | 9,728                   | 11.0 | 20,251            | 2.0  |  |

Abbreviations: N, number; T, Tested

<sup>a</sup>Includes genetic tests performed from January 1, 2013, through first quarter of 2021 (through March 31)<sup>b</sup>Includes diagnoses only through the first quarter of 2019 (through March 31)

**eTable 4.** Logistic regression model output for individuals diagnosed with cancer in Georgia and California and reported to SEER registries from 2013-2019, controlling for age and cancer type and allowing for a year by cancer type interaction (odds ratios and 95% confidence interval)

|                           | Odds Ratio | 95% CI        |
|---------------------------|------------|---------------|
| Age (decades)             | 0.51       | [0.51,0.52]   |
| Year of diagnosis         | 1.20       | [1.18,1.22]   |
| Cancer type               |            |               |
| Colon                     | 1          | [1,1]         |
| Uterine                   | 1.01       | [0.95,1.07]   |
| Breast-Female             | 5.97       | [5.78,6.17]   |
| Lung                      | 0.068      | [0.059,0.078] |
| Ovary                     | 13.5       | [12.9,14.1]   |
| Pancreas                  | 0.92       | [0.85,0.99]   |
| Prostate                  | 0.13       | [0.11,0.14]   |
| Breast-Male               | 28.8       | [25.5,32.5]   |
| Multiple                  | 2.46       | [2.37,2.54]   |
| All Other                 | 0.10       | [0.097,0.11]  |
| Year x Cancer Interaction |            |               |
| Colon x year              | 1          | [1,1]         |
| Uterine x year            | 1.07       | [1.04,1.10]   |
| Breast-Female x year      | 0.93       | [0.91,0.95]   |
| Lung x year               | 1.20       | [1.12,1.29]   |
| Ovary x year              | 0.99       | [0.96,1.01]   |
| Pancreas x year           | 1.48       | [1.43,1.55]   |
| Prostate x year           | 1.68       | [1.60,1.76]   |
| Breast-Male x year        | 0.85       | [0.80,0.91]   |
| Multiple x year           | 0.97       | [0.95,0.98]   |
| All Other x year          | 1.13       | [1.10,1.15]   |
| N                         | 1369602    |               |

**Table 5.** Three logistic regression model outputs regressing genetic testing on SEER racial and ethnic categories controlling for year, age and a variable that indicates three cancers with the highest testing rates that had testing guidelines throughout the study period (male breast, female breast, and ovarian cancer) for cancers diagnosed in Georgia and California from 2013-2019. The base model includes the year cancer-type interaction, the second model includes an interaction between race and ethnicity and the breast-ovarian grouping variable and the third includes an interaction of race and ethnicity and year.

|                             | Base       |             | Cancer type interaction |             | Year interaction |             |
|-----------------------------|------------|-------------|-------------------------|-------------|------------------|-------------|
|                             | Odds Ratio | 95% CI      | Odds Ratio              | 95% CI      | Odds Ratio       | 95% CI      |
| Breast-ovary                | 61.4       | [59.2,63.7] | 66.0                    | [63.5,68.6] | 66.2             | [63.6,68.8] |
| Year of diagnosis           | 1.13       | [1.12,1.13] | 1.13                    | [1.12,1.13] | 1.13             | [1.12,1.14] |
| Age (decades)               | 0.50       | [0.50,0.50] | 0.50                    | [0.50,0.50] | 0.50             | [0.50,0.50] |
| Race-Ethnic group:          |            |             |                         |             |                  |             |
| NH White                    | 1          | [1,1]       | 1                       | [1,1]       | 1                | [1,1]       |
| Black                       | 0.70       | [0.68,0.72] | 0.67                    | [0.64,0.70] | 0.67             | [0.65,0.70] |
| Asian                       | 0.68       | [0.67,0.70] | 0.93                    | [0.89,0.97] | 0.93             | [0.89,0.97] |
| Hispanic                    | 0.67       | [0.66,0.69] | 0.74                    | [0.71,0.76] | 0.75             | [0.72,0.77] |
| Other                       | 0.55       | [0.51,0.59] | 0.53                    | [0.47,0.59] | 0.53             | [0.47,0.60] |
| Cancer type:                |            |             |                         |             |                  |             |
| Colon                       | 10.3       | [9.79,10.7] | 10.2                    | [9.72,10.7] | 10.2             | [9.72,10.7] |
| Uterine                     | 10.5       | [9.86,11.1] | 10.3                    | [9.70,10.9] | 10.3             | [9.70,10.9] |
| Breast-Female               | 1          | [1,1]       | 1                       | [1,1]       | 1                | [1,1]       |
| Lung                        | 0.67       | [0.58,0.78] | 0.68                    | [0.59,0.78] | 0.68             | [0.59,0.78] |
| Ovary                       | 2.26       | [2.18,2.35] | 2.27                    | [2.19,2.35] | 2.27             | [2.19,2.35] |
| Pancreas                    | 9.40       | [8.65,10.2] | 9.39                    | [8.65,10.2] | 9.39             | [8.65,10.2] |
| Prostate                    | 1.30       | [1.17,1.44] | 1.33                    | [1.20,1.47] | 1.33             | [1.20,1.47] |
| Breast-Male                 | 4.76       | [4.23,5.35] | 4.70                    | [4.18,5.29] | 4.70             | [4.18,5.29] |
| Multiple                    | 24.0       | [23.1,25.0] | 24.4                    | [23.5,25.4] | 24.4             | [23.5,25.4] |
| All Other                   | 1          | [1,1]       | 1                       | [1,1]       | 1                | [1,1]       |
| Cancer x Year:              |            |             |                         |             |                  |             |
| Colon x year                | 1.08       | [1.06,1.09] | 1.07                    | [1.05,1.09] | 1.07             | [1.05,1.09] |
| Uterine x year              | 1.15       | [1.12,1.18] | 1.15                    | [1.12,1.18] | 1.15             | [1.12,1.18] |
| Breast-Female x year        | 1          | [1,1]       | 1                       | [1,1]       | 1                | [1,1]       |
| Lung x year                 | 1.29       | [1.20,1.38] | 1.29                    | [1.20,1.38] | 1.28             | [1.20,1.38] |
| Ovary x year                | 1.06       | [1.04,1.08] | 1.06                    | [1.04,1.08] | 1.06             | [1.04,1.08] |
| Pancreas x year             | 1.60       | [1.54,1.66] | 1.60                    | [1.54,1.66] | 1.60             | [1.54,1.66] |
| Prostate x year             | 1.80       | [1.73,1.88] | 1.80                    | [1.73,1.88] | 1.80             | [1.73,1.88] |
| Breast-Male x year          | 0.92       | [0.86,0.98] | 0.92                    | [0.86,0.98] | 0.92             | [0.86,0.98] |
| Multiple x year             | 1.04       | [1.03,1.05] | 1.04                    | [1.02,1.05] | 1.03             | [1.02,1.04] |
| All Other x year            | 1.21       | [1.19,1.23] | 1.21                    | [1.19,1.23] | 1.21             | [1.19,1.23] |
| Breast-ovary x Race-Ethnic: |            |             |                         |             |                  |             |
| Breast-ovary x NH White     |            |             | 1                       | [1,1]       | 1                | [1,1]       |
| Breast-ovary x Black        |            |             | 1.06                    | [1.01,1.12] | 1.06             | [1.01,1.12] |
| Breast-ovary x Asian        |            |             | 0.62                    | [0.59,0.65] | 0.62             | [0.59,0.65] |
| Breast-ovary x Hispanic     |            |             | 0.86                    | [0.82,0.90] | 0.85             | [0.82,0.89] |
| Breast-ovary x Other        |            |             | 1.08                    | [0.94,1.25] | 1.08             | [0.93,1.24] |
| Race-Ethnic x Year:         |            |             |                         |             |                  |             |
| NH White x year             |            |             |                         |             | 1                | [1,1]       |
| Black x year                |            |             |                         |             | 0.99             | [0.98,1.01] |
| Asian x year                |            |             |                         |             | 1.00             | [0.98,1.01] |
| Hispanic x year             |            |             |                         |             | 0.98             | [0.97,0.99] |
| Other x year                |            |             |                         |             | 0.99             | [0.95,1.03] |
| Likelihood ratio Chi2       |            |             | 380.5                   |             | 9.76             |             |
| Degrees of freedom          |            |             | 4                       |             | 4                |             |
| p-value                     |            |             | 4.5e-81                 |             | 0.045            |             |
| N                           | 1369602    |             | 1369602                 |             | 1369602          |             |

**Table 6.** Uncertain and pathogenic results<sup>a</sup> and ratio in individuals with selected cancers diagnosed and reported to Georgia and California SEER registries, 2013-2019

| Year of Diagnosis | Breast, Female (n=52,893) |      |      | Breast, Male (n=672) |      |      | Colorectal (n=5,277) |      |      | Endometrial (n=2,434) |      |      | Lung (n=313) |      |      | Ovarian (n=6,345) |      |      | Pancreas (n=1,711) |      |      | Prostate (n=1,502) |      |      | Multiple Primary Tumors (n=17,239) |      |      |
|-------------------|---------------------------|------|------|----------------------|------|------|----------------------|------|------|-----------------------|------|------|--------------|------|------|-------------------|------|------|--------------------|------|------|--------------------|------|------|------------------------------------|------|------|
|                   | U%                        | P%   | U:P  | U%                   | P%   | U:P  | U%                   | P%   | U:P  | U%                    | P%   | U:P  | U%           | P%   | U:P  | U%                | P%   | U:P  | U%                 | P%   | U:P  | U%                 | P%   | U:P  | U%                                 | P%   | U:P  |
| 2013              | 7.2                       | 7.8  | 0.92 | 7.4                  | 14.8 | 0.50 | 8.3                  | 19.4 | 0.43 | 8.8                   | 13.8 | 0.64 | 18.8         | 12.5 | 1.50 | 7.8               | 17.7 | 0.44 | 7.6                | 9.4  | 0.80 | 0.0                | 29.4 | 0.00 | 7.6                                | 13.0 | 0.58 |
| 2014              | 12.0                      | 8.6  | 1.39 | 8.0                  | 13.4 | 0.60 | 14.7                 | 17.3 | 0.85 | 15.9                  | 11.7 | 1.36 | 13.0         | 13.0 | 1.00 | 13.0              | 17.1 | 0.76 | 14.9               | 16.0 | 0.93 | 12.1               | 21.2 | 0.57 | 12.0                               | 14.0 | 0.86 |
| 2015              | 16.9                      | 10.6 | 1.59 | 14.2                 | 16.8 | 0.84 | 17.4                 | 16.6 | 1.05 | 20.0                  | 16.9 | 1.18 | 7.4          | 25.9 | 0.29 | 16.4              | 16.3 | 1.01 | 17.2               | 15.6 | 1.10 | 15.4               | 15.4 | 1.00 | 15.0                               | 15.5 | 0.97 |
| 2016              | 18.5                      | 10.9 | 1.70 | 18.9                 | 20.7 | 0.91 | 19.2                 | 18.9 | 1.02 | 17.7                  | 19.2 | 0.92 | 12.7         | 3.6  | 3.50 | 17.7              | 18.5 | 0.96 | 22.0               | 17.3 | 1.27 | 18.5               | 18.5 | 1.00 | 18.8                               | 16.1 | 1.17 |
| 2017              | 22.8                      | 10.9 | 2.10 | 17.9                 | 19.8 | 0.90 | 26.4                 | 16.2 | 1.63 | 24.4                  | 15.4 | 1.59 | 33.3         | 7.6  | 4.40 | 21.9              | 15.9 | 1.38 | 27.8               | 18.9 | 1.47 | 24.0               | 16.1 | 1.49 | 22.4                               | 16.8 | 1.34 |
| 2018              | 26.4                      | 11.5 | 2.30 | 32.4                 | 14.8 | 2.19 | 27.9                 | 17.0 | 1.65 | 26.8                  | 13.6 | 1.98 | 31.6         | 17.9 | 1.77 | 23.1              | 16.4 | 1.41 | 28.0               | 21.1 | 1.33 | 28.4               | 11.0 | 2.58 | 25.2                               | 16.3 | 1.54 |
| 2019 <sup>b</sup> | 29.2                      | 11.0 | 2.66 | 19.5                 | 36.6 | 0.53 | 27.4                 | 16.8 | 1.63 | 26.1                  | 11.8 | 2.21 | 32.3         | 12.9 | 2.50 | 26.9              | 15.2 | 1.77 | 28.5               | 14.1 | 2.03 | 33.6               | 11.5 | 2.93 | 30.4                               | 17.0 | 1.78 |

Abbreviations: SEER, Surveillance, Epidemiology and End Results; U, uncertain results only (no pathogenic results); P, pathogenic results; U:P, ratio of uncertain results to pathogenic results

<sup>a</sup>Includes genetic test results from January 1, 2013, through first quarter of 2021 (through March 31); cell percentage is the number of patients with given result divided by number of patients tested for that cancer type and year

<sup>b</sup>Includes cancer diagnoses through the first quarter of 2019 (through March 31)

**Table 7.** Uncertain and pathogenic results<sup>a</sup> and ratio in individuals with cancers diagnosed and reported to Georgia and California SEER Registries, 2013-2019, by race and ethnicity

| Year of Diagnosis | Asian<br>(n=10,284) |      |      | Black<br>(n=9,606) |      |      | Hispanic<br>(n=16,538) |      |      | Non-Hispanic White<br>(n=55,601) |      |      | Other<br>(n=1,023) |      |      |
|-------------------|---------------------|------|------|--------------------|------|------|------------------------|------|------|----------------------------------|------|------|--------------------|------|------|
|                   | U%                  | P%   | U:P  | U%                 | P%   | U:P  | U%                     | P%   | U:P  | U%                               | P%   | U:P  | U%                 | P%   | U:P  |
| 2013              | 12.2                | 9.3  | 1.31 | 7.5                | 9.7  | 0.77 | 8.6                    | 12.1 | 0.71 | 6.3                              | 10.1 | 0.63 | 3.8                | 6.3  | 0.60 |
| 2014              | 18.4                | 10.8 | 1.71 | 17.4               | 9.4  | 1.86 | 10.7                   | 12.8 | 0.84 | 10.9                             | 10.9 | 1.00 | 7.4                | 9.9  | 0.75 |
| 2015              | 26.0                | 11.7 | 2.21 | 23.0               | 10.1 | 2.27 | 16.2                   | 15.9 | 1.02 | 13.9                             | 12.3 | 1.13 | 13.5               | 10.8 | 1.25 |
| 2016              | 29.0                | 11.7 | 2.47 | 24.3               | 13.5 | 1.80 | 18.3                   | 15.7 | 1.16 | 15.6                             | 12.9 | 1.21 | 17.6               | 17.6 | 1.00 |
| 2017              | 34.1                | 10.8 | 3.16 | 29.9               | 11.1 | 2.71 | 21.3                   | 15.2 | 1.40 | 20.1                             | 13.3 | 1.51 | 35.0               | 13.3 | 2.63 |
| 2018              | 40.1                | 9.9  | 4.07 | 32.8               | 10.8 | 3.03 | 25.9                   | 16.0 | 1.62 | 22.2                             | 14.2 | 1.56 | 28.2               | 9.1  | 3.09 |
| 2019 <sup>b</sup> | 40.0                | 10.2 | 3.91 | 39.0               | 11.0 | 3.55 | 29.3                   | 13.2 | 2.21 | 24.9                             | 14.4 | 1.73 | 34.6               | 9.1  | 3.80 |

Abbreviations: SEER, Surveillance, Epidemiology and End Results; U, uncertain results only (no pathogenic results); P, pathogenic results; U:P, ratio of uncertain results to pathogenic results

<sup>a</sup>Includes genetic test results from January 1, 2013, through first quarter of 2021 (through March 31); cell percentage is the number of patients with given result divided by number of patients tested for that race or ethnicity and year category

<sup>b</sup>Includes cancer diagnoses through the first quarter of 2019 (through March 31)
