# Supplementary material
Source: PubMed Central journal article supplement (PMC10242510)
Supplement: jama-e239526-s002.pdf [file jama-e239526-s002.pdf]

## Data Sharing Statement

Kurian. Germline Genetic Testing After Cancer Diagnosis. *JAMA*. Published June 05, 2023.  
doi:10.1001/jama.2023.9526

### Data

**Data available:** No

### Additional Information

**Explanation for why data not available:** The Genelink Study dataset is under data use agreements between test industry partners and the University of Michigan that restrict access at this time to the participating scientists. Discussions are underway to enable a broader data sharing plan.
